# Supplementary material for: From Neural Connectopathy to a Therapeutic Path: An Integrated Multi-omics Framework Identifies a Causal Gene and Drug Candidates for Parkinson's Disease with mild cognitive impairment
Source: Research Square preprint supplement (doi:10.21203/rs.3.rs-7937441/v1), 2025-11-18
Supplement: Supplementary file 1 [file 68bf1713fd177edbb1fd0d55.docx]

**Supplementary Information**


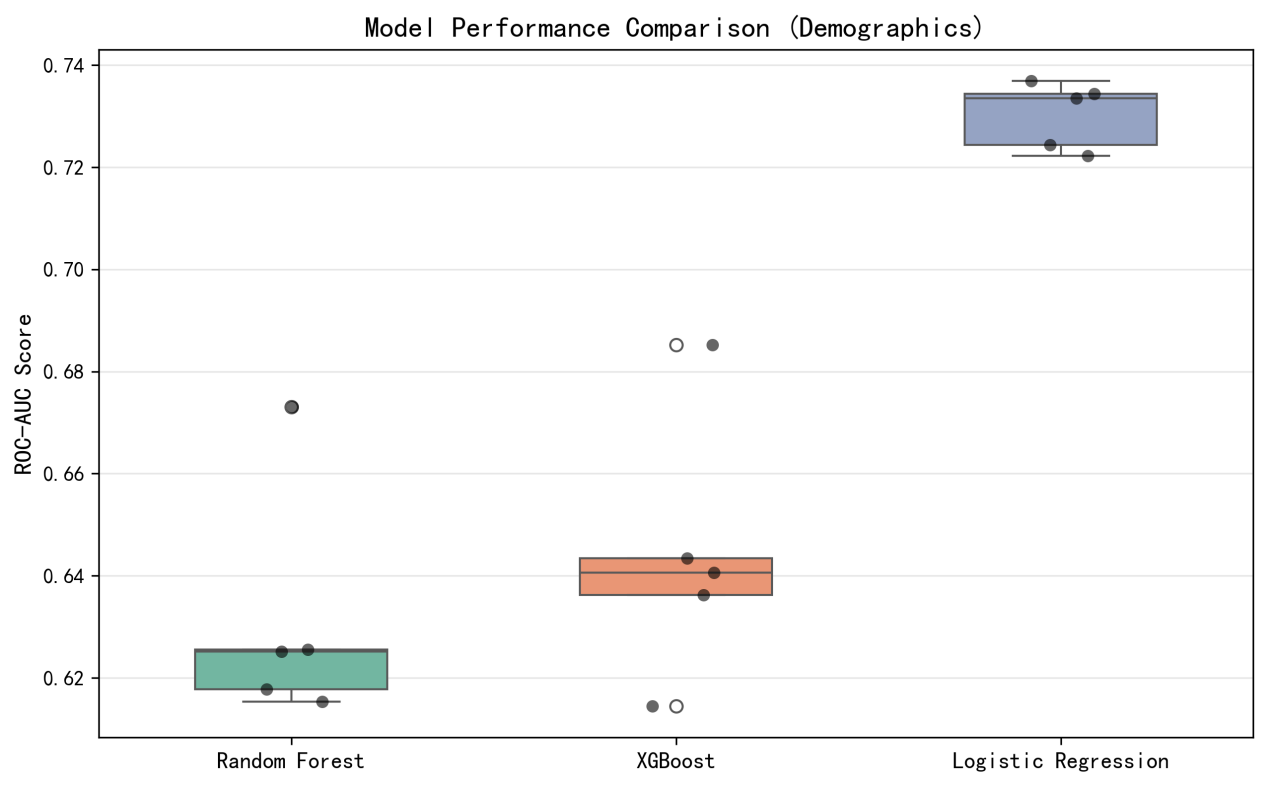


**Supplementary Figure 1. Comparative Evaluation of Machine Learning Models for Predicting Cognitive Impairment in Parkinson's Disease based on Demographics**


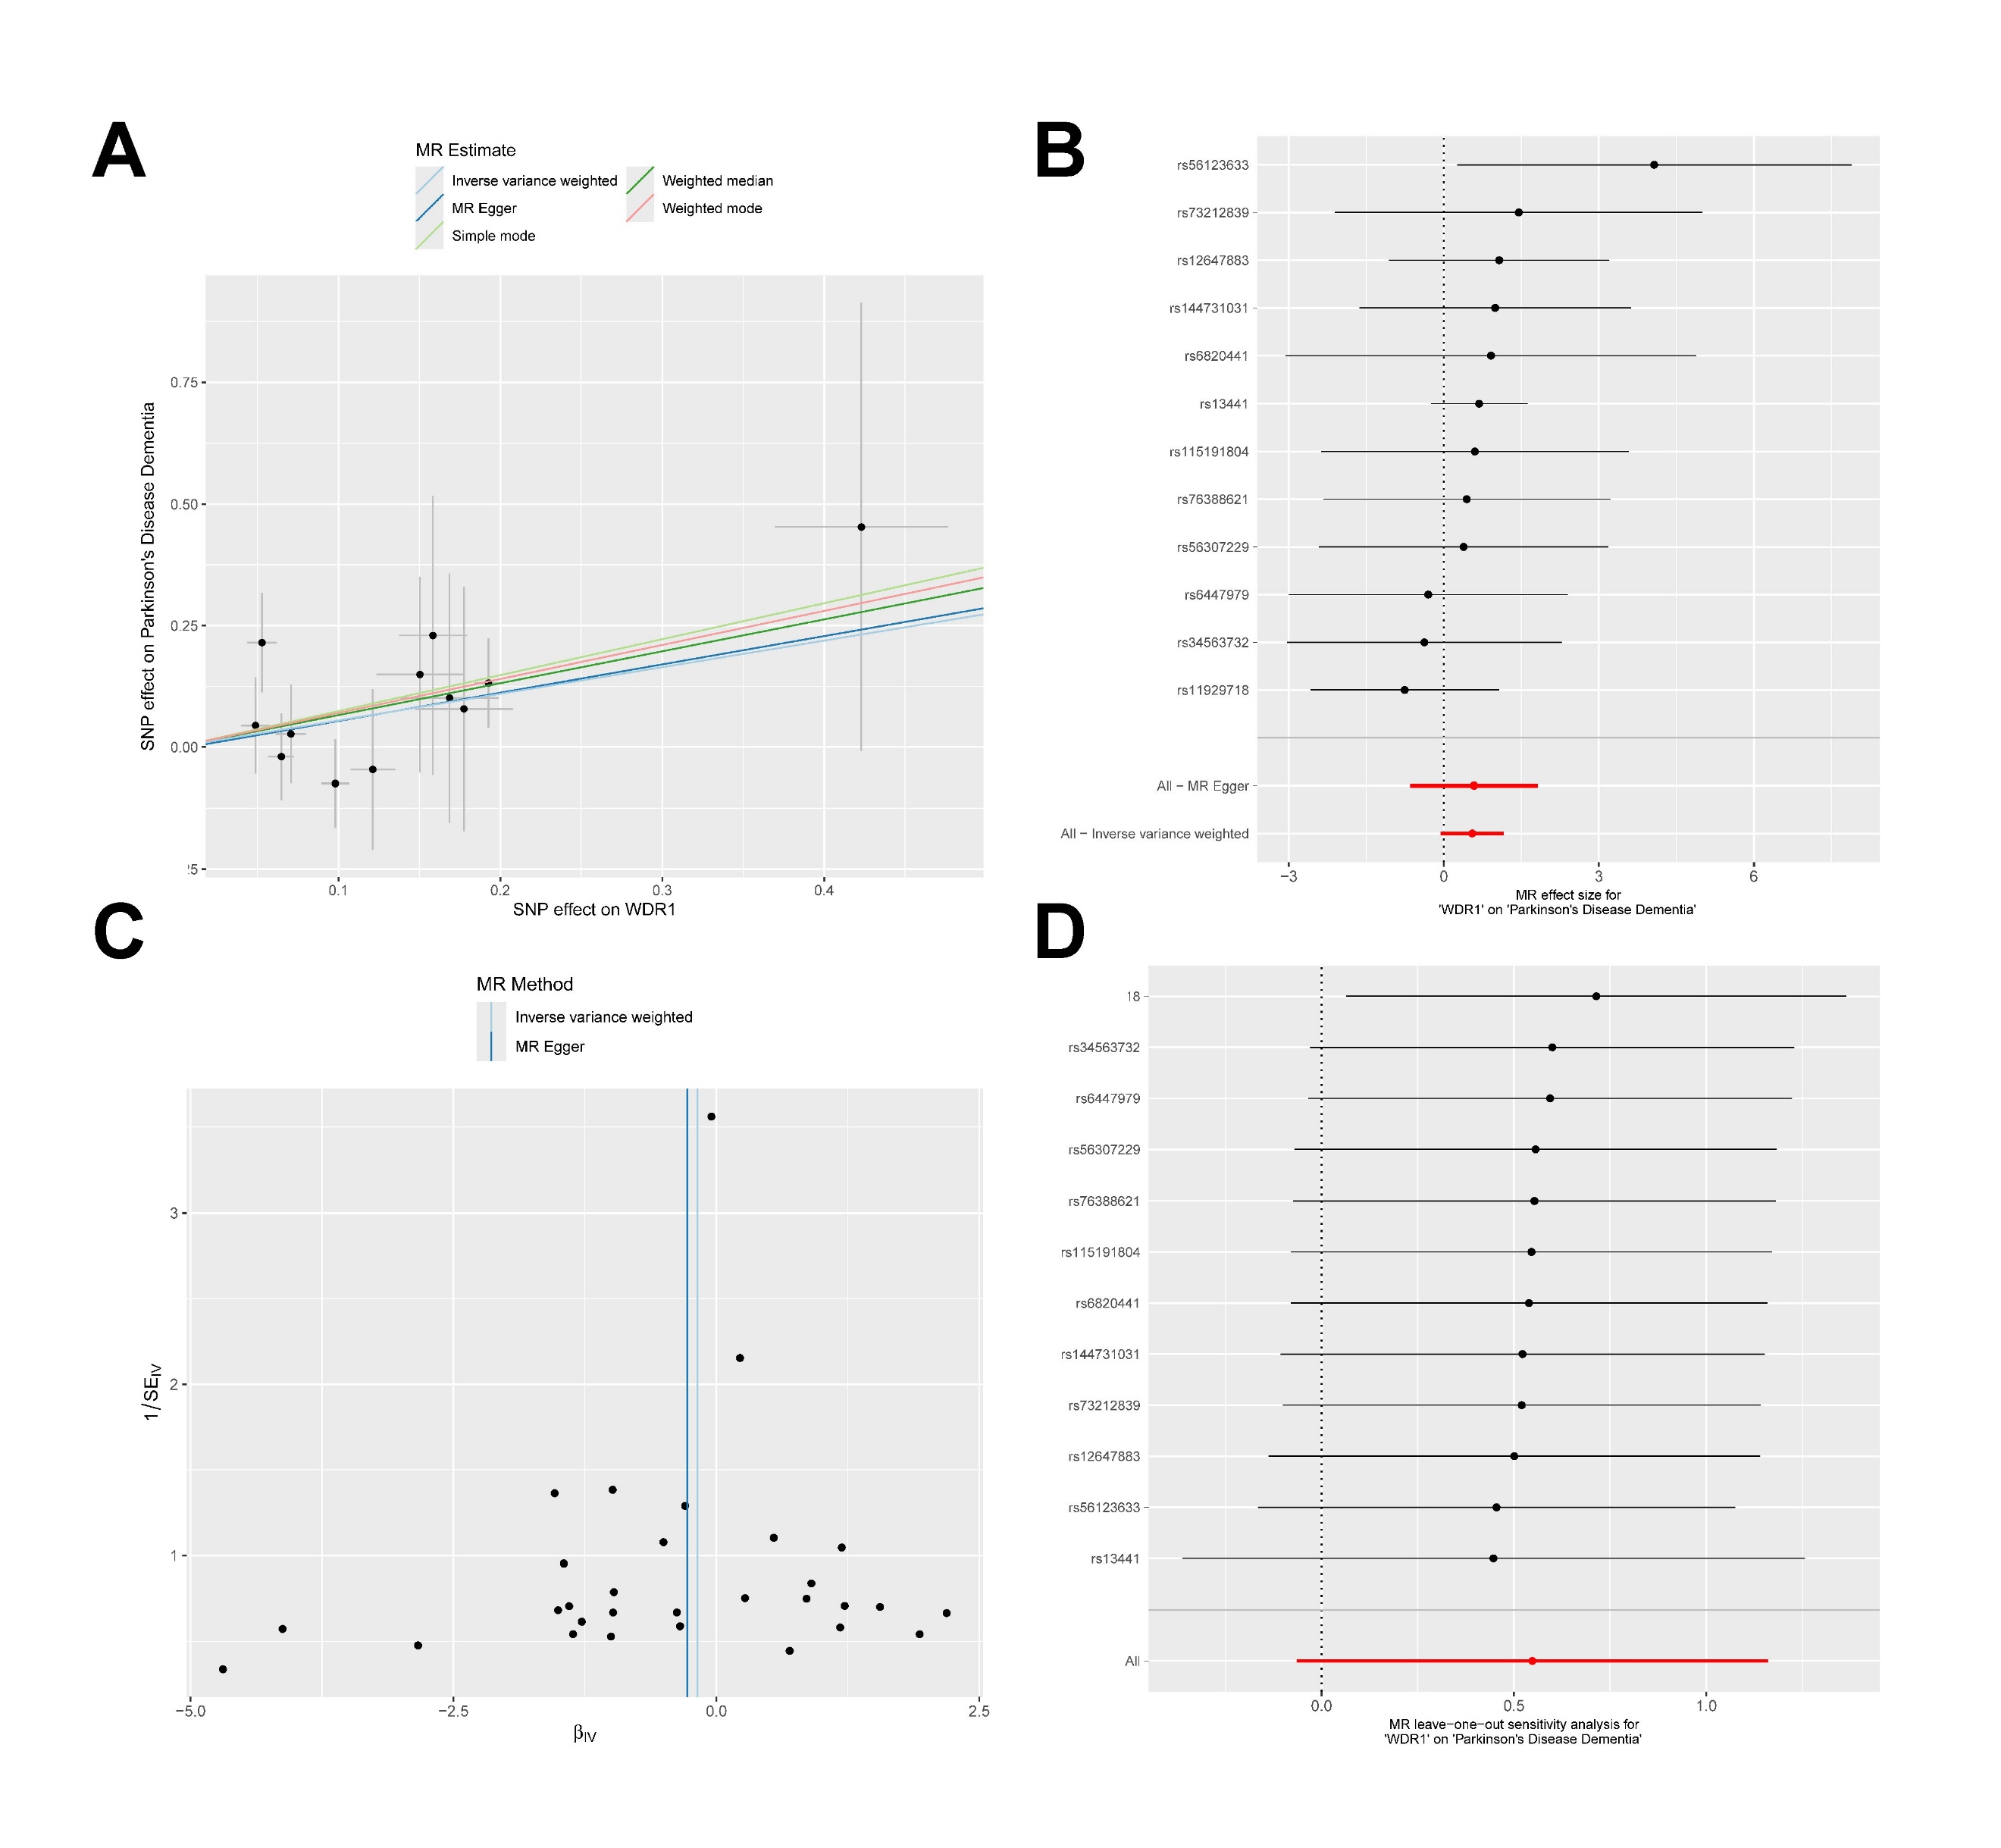

**Supplementary Figure 2. Sensitivity, heterogeneity, and pleiotropy analysis for the Mendelian randomization of WDR11 on PDD.**

(A) Scatter Plot. (B) Forest Plot. (C) Funnel Plot. (D) Leave-one-out sensitivity analysis.

**
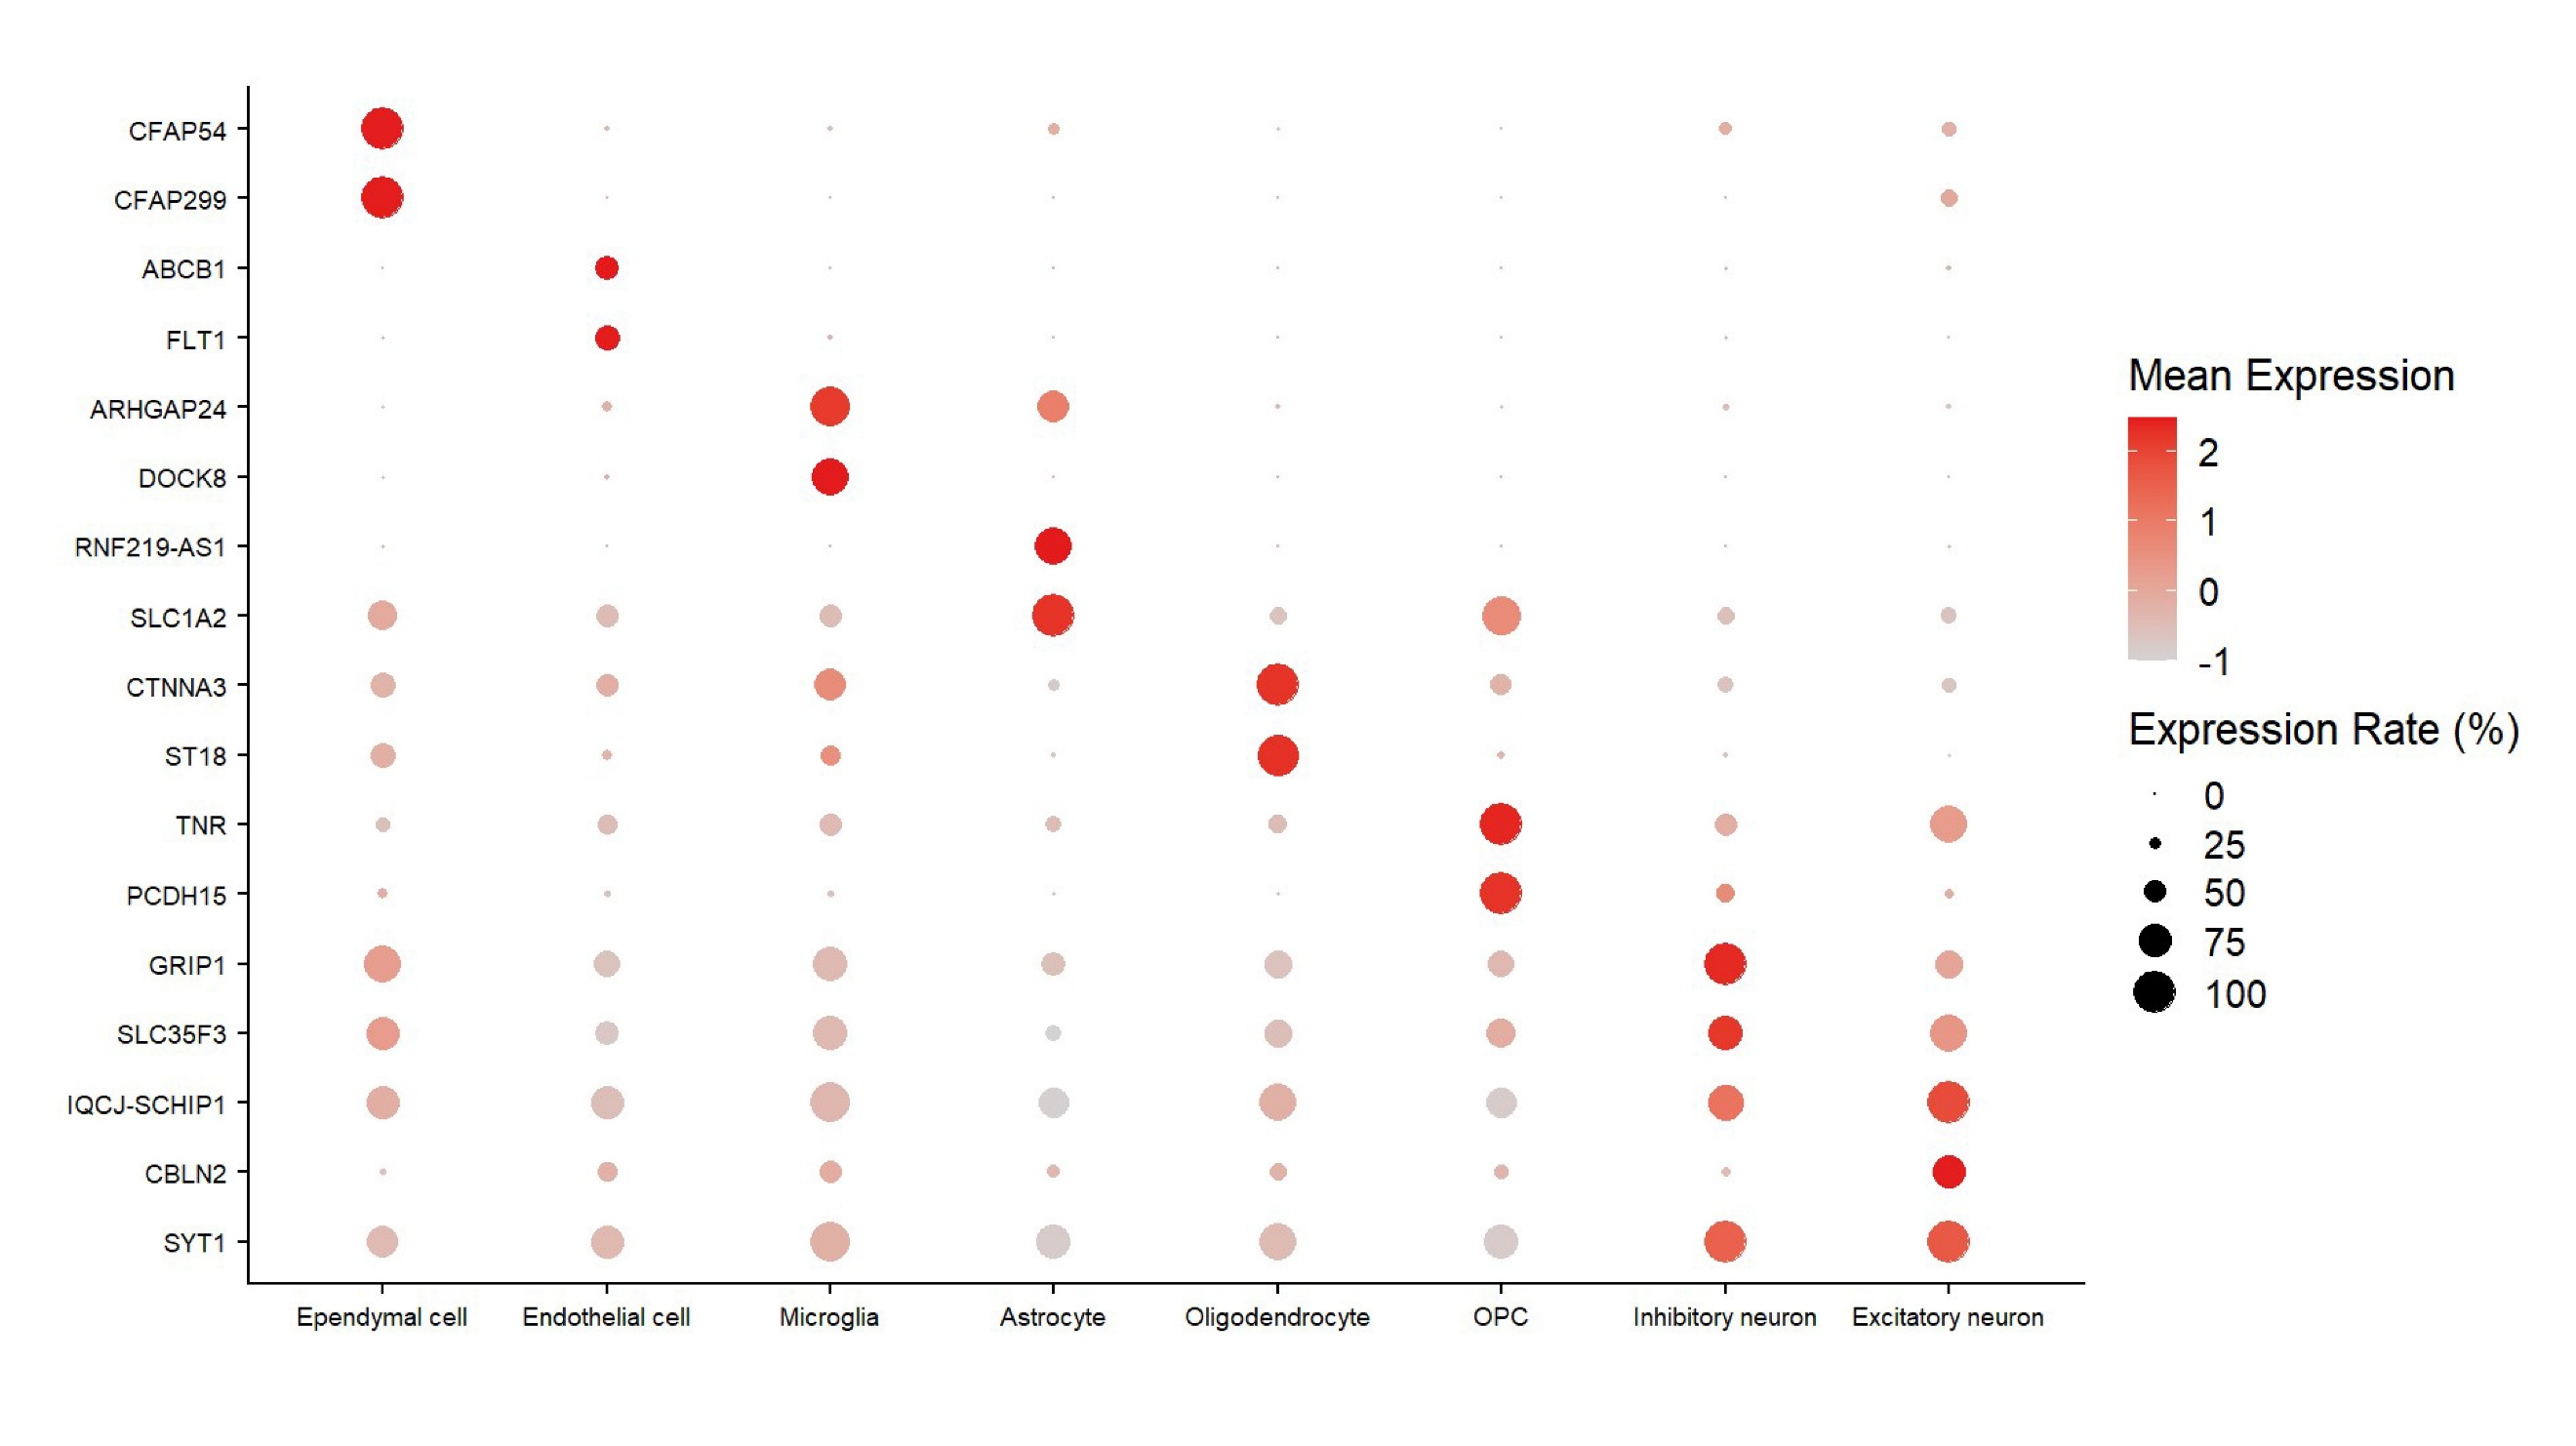
**

**Supplementary Figure 3. Gene Marker Annotation of snRNA-seq Data**

Dot plot demonstrating the expression of selected marker genes for individual cell types. The size of each dot indicates the percentage of cells within a cluster that express a specific gene. The colour of the dot represents the average log-normalised expression level of that gene.


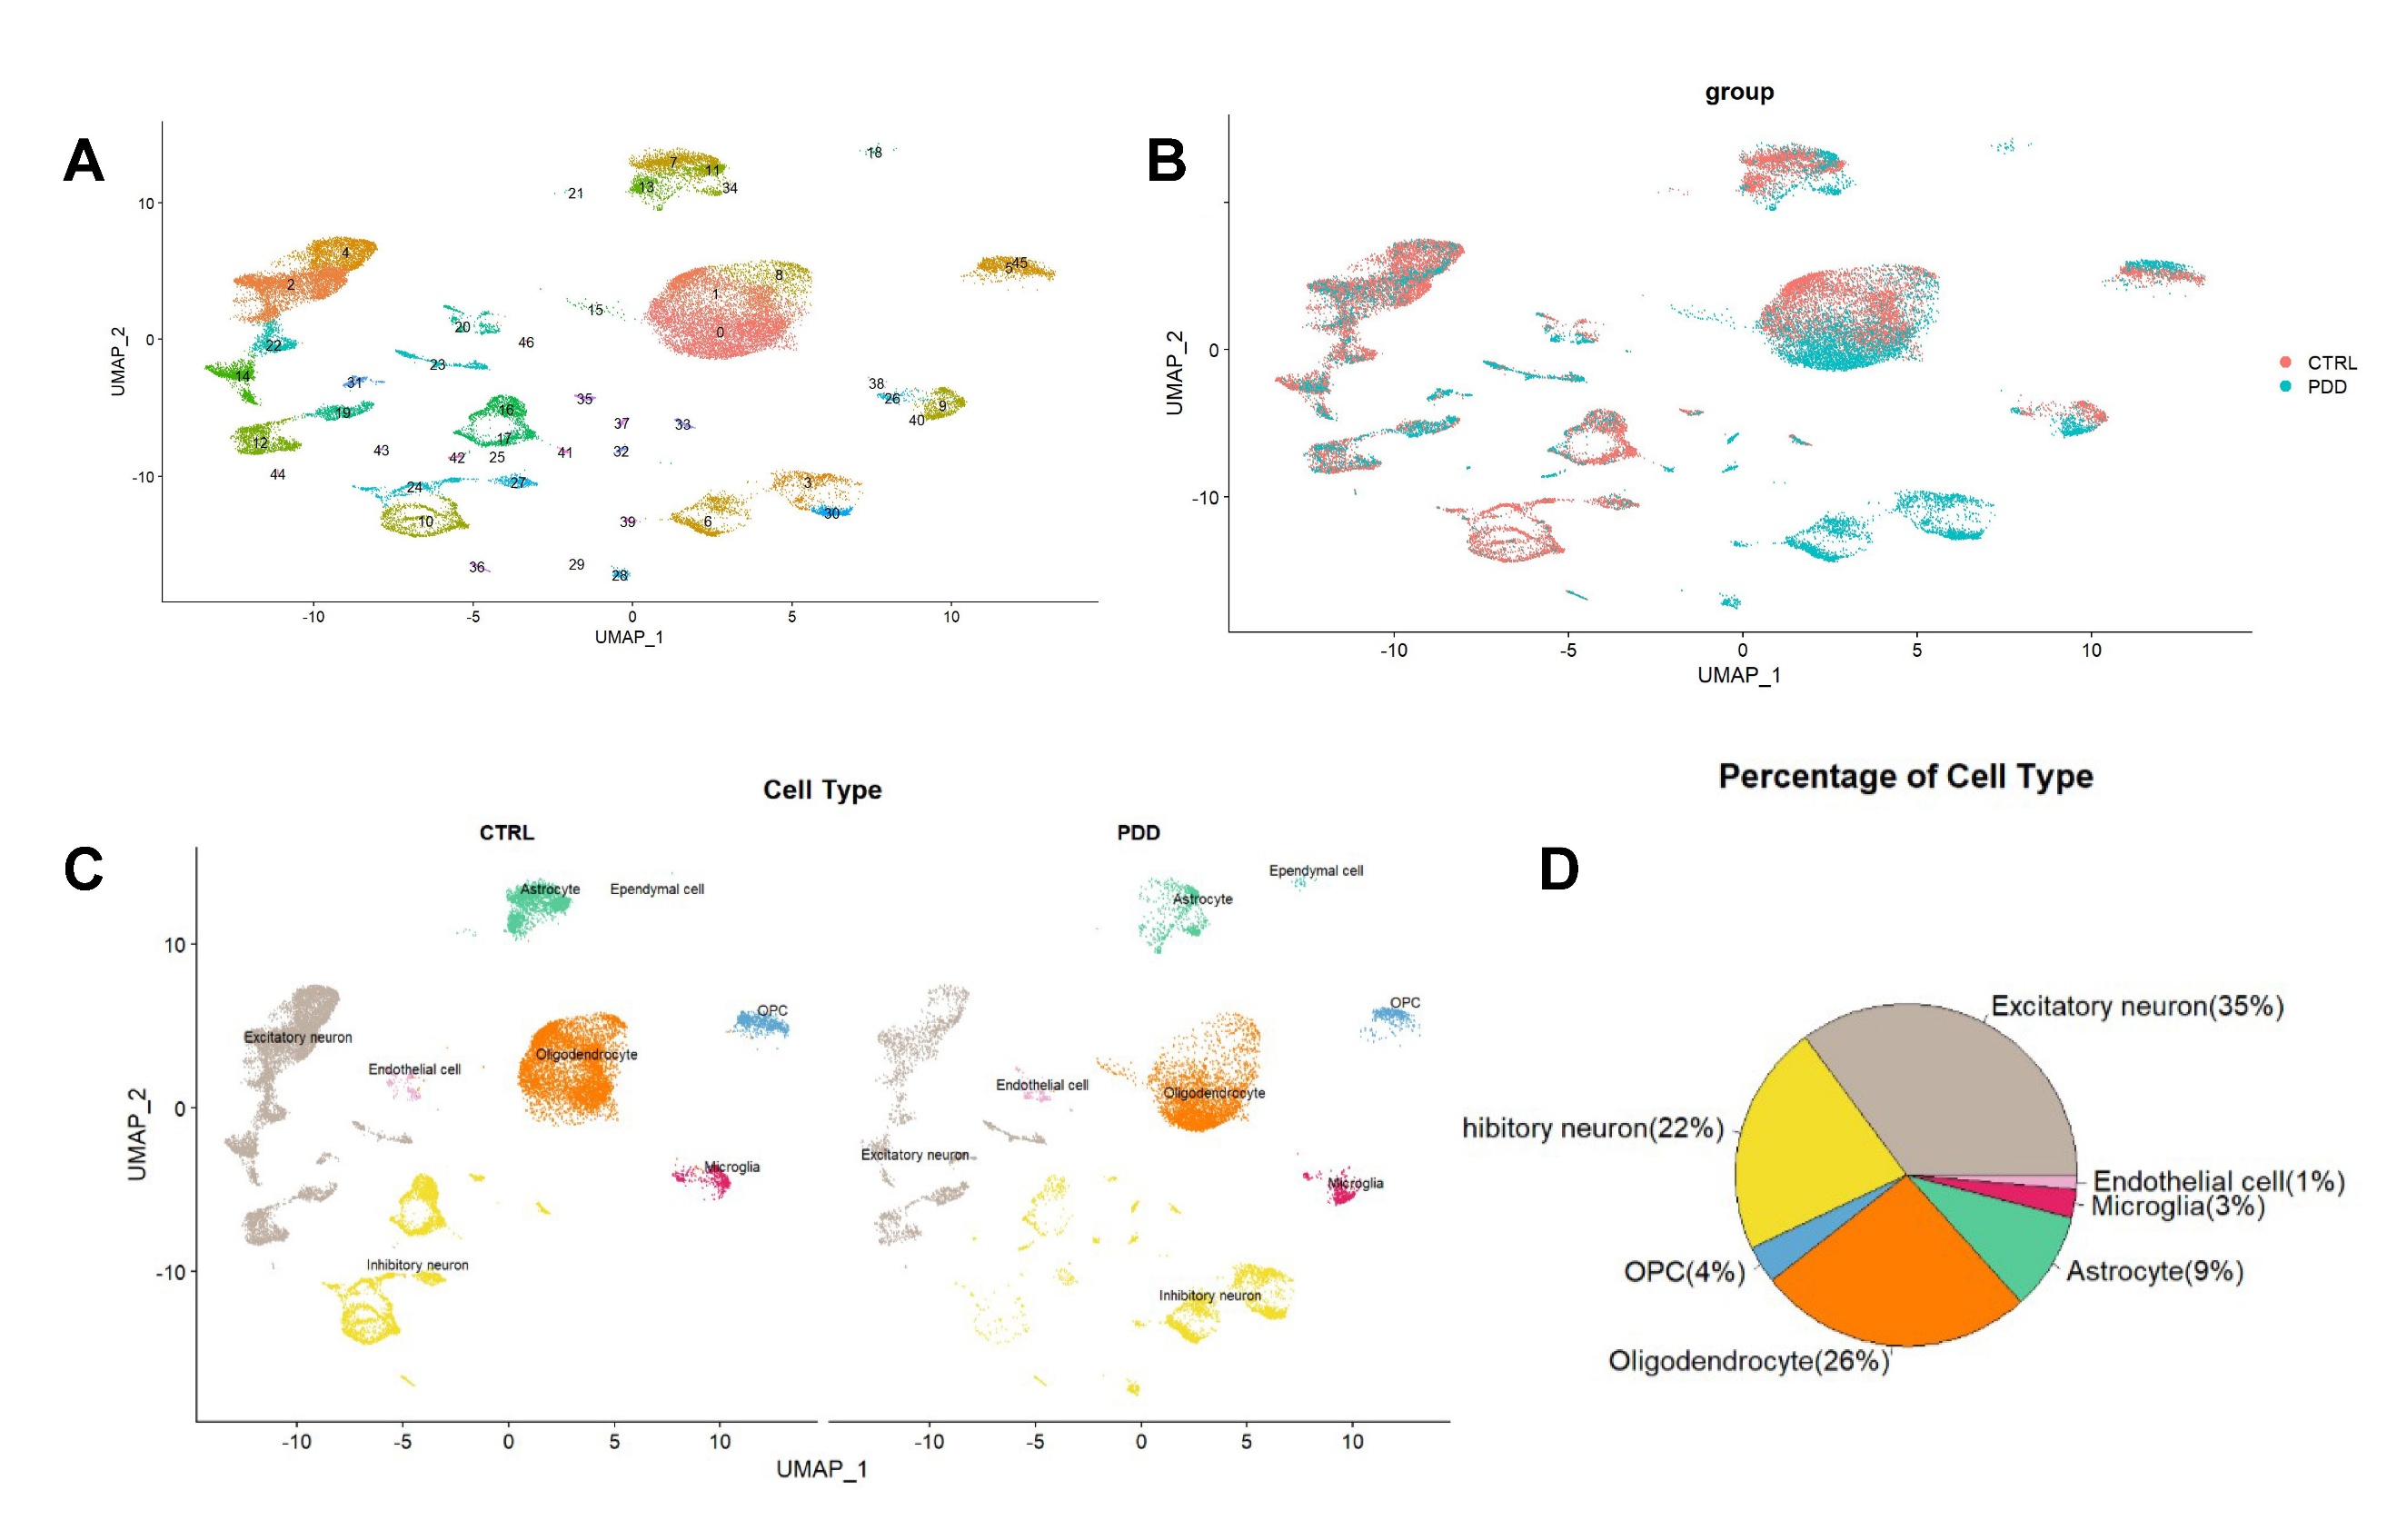


**Supplementary Figure 4. Quality Control and Annotation of snRNA-seq Data**

**(A-C) UMAP visualization. (A)** Each digit represents a cell subset, demonstrating finer cellular heterogeneity. (B) **Sample-wise. (C) Cell type-specific. (D)** Pie chart detailing the percentage of nuclei assigned to each cell type.


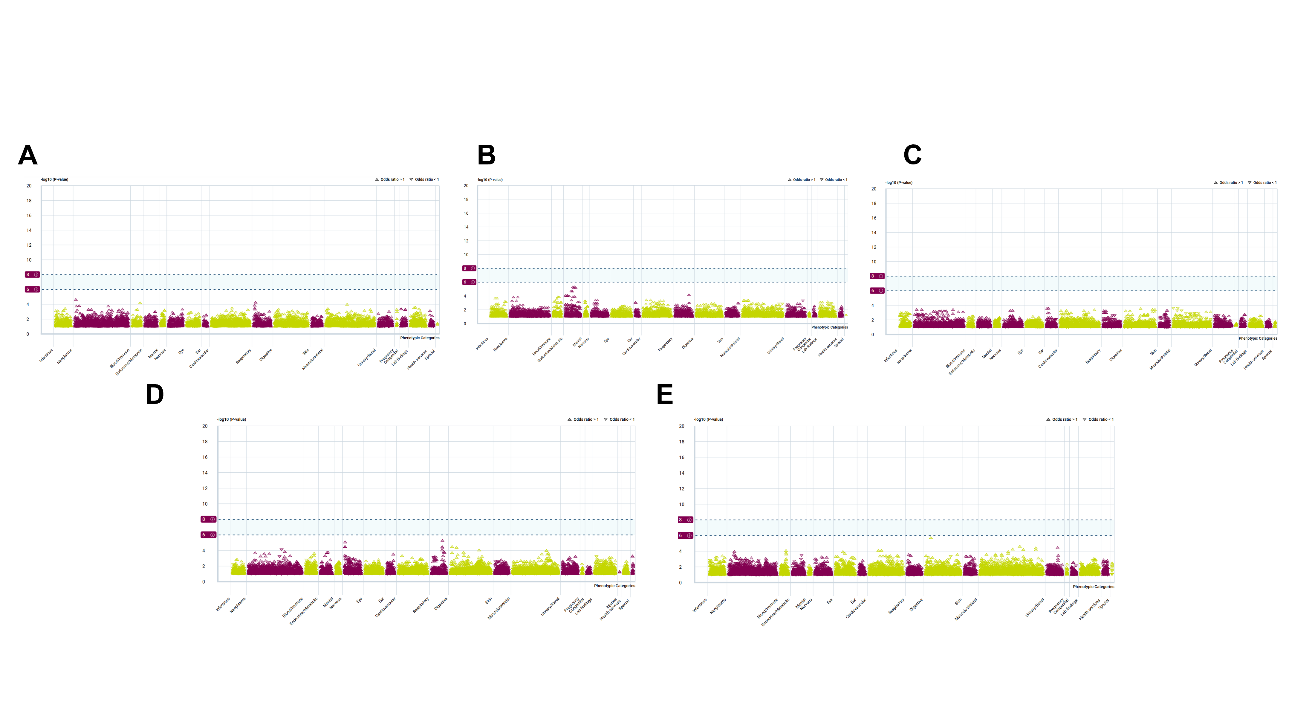
**Supplementary Figure 5. Phenome-wide Association Study**

**(A-E)** Manhattan plots show associations between SNPs used for instrumental variables and broad human phenotypes. The key finding was that these SNPs were significantly associated with targeted gene levels (in the "biomarker" category), but none of them were significantly associated with other neuropsychiatric, metabolic, or immune phenotypes (no dots above the red horizontal line). This strongly demonstrates the specificity of instrumental variables and greatly reduces the possibility of causal estimation bias due to pleiotropy. (A) CA1; (B) MMP12; (C) MSMB; (D) POSTN; (E) PLEKHH2.

Supplementary Table 1: Drug Targets and Drug Candidates

| gene | drug | regulatory approval | indication | interaction score |
| --- | --- | --- | --- | --- |
| CA1 | SULFAMIDE | Not Approved |  | 1.305094963972138 |
| CA1 | METHAZOLAMIDE | Approved | Diuretics; Antiglaucoma agents,Antihypertensive Agents | 1.04407597117771 |
| CA1 | ACETAZOLAMIDE | Approved | Anticonvulsants; Diuretics; antiglaucomic agent | 0.745768550841222 |
| CA1 | ETHOXZOLAMIDE | Approved | Diuretics; Antiglaucoma agents,Antihypertensive Agents | 0.6960506474518071 |
| CA1 | MEDRONIC ACID | Approved |  | 1.305094963972138 |
| CA1 | CURCUMIN | Approved |  | 0.03954833224157995 |
| CA1 | CHLOROTHIAZIDE | Approved | Antihypertensive Agents; Diuretics | 0.745768550841222 |
| CA1 | TRICHLORMETHIAZIDE | Approved | Antihypertensive Agents; Diuretics | 0.8700633093147588 |
| CA1 | PHENOL | Approved |  | 1.957642445958207 |
| CA1 | POLMACOXIB | Not Approved | NSAID | 2.610189927944276 |
| CA1 | ACETAZOLAMIDE SODIUM | Approved |  | 0.6525474819860692 |
| CA1 | DICHLORPHENAMIDE | Approved | Antiglaucomic Agents | 2.088151942355421 |
| CA1 | PARABEN | Not Approved |  | 0.6525474819860692 |
| CA1 | ZONISAMIDE | Approved | anticonvulsant,antipsychotic agent,appetite suppressant | 0.104407597117771 |
| CA1 | CATECHOL | Not Approved |  | 0.2372899934494797 |
| CA1 | FERULIC ACID | Approved |  | 0.5220379855888553 |
| CA1 | LEVETIRACETAM | Approved | anticonvulsant | 0.372884275420611 |
| CA1 | METHOCARBAMOL | Approved |  | 0.4350316546573794 |
| CA1 | RESORCINOL | Approved |  | 2.610189927944276 |
| CA1 | SULTHIAME | Approved |  | 0.2175158273286897 |
| MMP12 | MARIMASTAT | Not Approved | Antineoplastic Agents | 0.3866948041398929 |
| MMP12 | ILOMASTAT | Not Approved |  | 0.2320168824839356 |
| MMP12 | ACETAZOLAMIDE | Approved | Anticonvulsants; Diuretics; antiglaucomic agent | 0.8286317231569132 |
| MMP12 | NEOVASTAT | Not Approved |  | 1.160084412419678 |
| MMP12 | DEFEROXAMINE | Approved |  | 0.6824025955409874 |
| MMP12 | CTS-1027 | Not Approved |  | 0.8286317231569132 |
| MMP12 | CAPTOPRIL | Approved | Antihypertensive Agents | 0.8923726249382143 |
| MMP12 | ZILEUTON | Approved | antiinflammatory agent | 1.288982680466309 |
| MMP12 | AZD-1236 | Not Approved |  | 2.900211031049196 |
| MSMB | TIGAPOTIDE | Not Approved |  | 52.2 |
| POSTN | ANTISERUM | Not Approved |  | 2.98 |
| PLEKHH2 | VERAPAMIL | Approved | antihypertensive agent | 1.16 |
| PLEKHH2 | ATENOLOL | Approved | Anti-Arrhythmia Agents; Antihypertensive Agents | 1.45 |
